# Supplementary material for: High-throughput selection of (new) enzymes: phage display-mediated isolation of alkyl halide hydrolases from a library of active-site mutated epoxide hydrolases
Source: Royal Society of Chemistry journal article supplement (doi:10.1039/d4fd00001c), 2024-01-01
Supplement: d4fd00001c1.pdf [file d4fd00001c1.pdf]

## High-throughput selection of (new) enzymes: phage display-mediated isolation of alkylhalide hydrolases from a library of active-site mutated epoxide hydrolases

Marija Blazic, Candice Gautier, Thomas Norberg and Mikael Widersten,\*

Department of Chemistry – BMC, Uppsala University, Box 576, SE-751 23 Uppsala, Sweden

\* mikael.widersten@kemi.uu.se

### Index

#### Supporting Tables

---

|                                                                                       |   |
|---------------------------------------------------------------------------------------|---|
| <b>Table S1</b> Oligonucleotides used in the construction of mutant cDNA library..... | 2 |
| <b>Table S2</b> Deduced amino acid sequences of selected protein variants.....        | 4 |

#### Supporting Figures

---

|                                                                                                                                                                                       |    |
|---------------------------------------------------------------------------------------------------------------------------------------------------------------------------------------|----|
| <b>Figure S1</b> Synthesis of building block <b>6</b> .....                                                                                                                           | 5  |
| <b>Figure S2</b> Block synthesis of bait substrate <b>8</b> .....                                                                                                                     | 5  |
| <b>Figure S3</b> TLC chromatograms of synthesis intermediates leading to compound <b>8</b> .....                                                                                      | 6  |
| <b>Figure S4</b> <sup>1</sup> H-NMR spectrum of compound <b>2</b> .....                                                                                                               | 7  |
| <b>Figure S5</b> <sup>1</sup> H-NMR and COESY spectra of compound <b>3</b> .....                                                                                                      | 8  |
| <b>Figure S6</b> <sup>1</sup> H- and <sup>13</sup> C-NMR spectra of compound <b>4</b> .....                                                                                           | 9  |
| <b>Figure S7</b> <sup>1</sup> H- and <sup>13</sup> C-NMR spectra of compound <b>6</b> .....                                                                                           | 10 |
| <b>Figure S8 Fig. S8</b> <sup>1</sup> H- and <sup>13</sup> C-NMR spectra of compound <b>8</b> .....                                                                                   | 11 |
| <b>Figure S9</b> Silent mutations (in yellow) in the StEH1 cDNA that removes an <i>Nco</i> I site at codons 30 – 32 and introduces a unique <i>Paul</i> site at codons 107 – 109..... | 11 |
| <b>Figure S10</b> Standard curve of peak area as a function of amount of alcohol <b>11</b> .....                                                                                      | 12 |

---

## Supporting Tables

**Table S1** Oligonucleotides used in the construction of mutant cDNA library

| Name     | Sequence 5'→3'                                       | Ratios in PCR | Mutation(s)  | Note                       |
|----------|------------------------------------------------------|---------------|--------------|----------------------------|
| Fp_PUC   | CCCAGTCACGACGTTGTAAAACG                              |               | -            | Fragment 1, forward primer |
| Rp_HYX1  | TATAGCCTTTAGCCCCTCAAC                                |               | -            | Fragment 1, reverse primer |
| Fp_HYN1A | GCTAAAGGCTATATATGGGGAAGATNDTNDTATATCGAGATTCAGGTACCGG | 144           | H153X, Y154X | Fragment A, forward primer |
|          | GCTAAAGGCTATATATGGGGAAGATNDTVMAATATCGAGATTCAGGTACCGG | 72            |              |                            |
|          | GCTAAAGGCTATATATGGGGAAGATNDTATGATATCGAGATTCAGGTACCGG | 12            |              |                            |
|          | GCTAAAGGCTATATATGGGGAAGATNDTTGGATATCGAGATTCAGGTACCGG | 12            |              |                            |
| Fp_HYV1B | GCTAAAGGCTATATATGGGGAAGATVMAVMAATATCGAGATTCAGGTACCGG | 36            |              |                            |
|          | GCTAAAGGCTATATATGGGGAAGATVMANDTATATCGAGATTCAGGTACCGG | 72            |              |                            |
|          | GCTAAAGGCTATATATGGGGAAGATVMAATGATATCGAGATTCAGGTACCGG | 6             |              |                            |
|          | GCTAAAGGCTATATATGGGGAAGATVMATGGATATCGAGATTCAGGTACCGG | 6             |              |                            |
| Fp_HYA1C | GCTAAAGGCTATATATGGGGAAGATATGATGATATCGAGATTCAGGTACCGG | 1             |              |                            |
|          | GCTAAAGGCTATATATGGGGAAGATATGNDTATATCGAGATTCAGGTACCGG | 12            |              |                            |
|          | GCTAAAGGCTATATATGGGGAAGATATGVMAATATCGAGATTCAGGTACCGG | 6             |              |                            |
|          | GCTAAAGGCTATATATGGGGAAGATATGTGGATATCGAGATTCAGGTACCGG | 1             |              |                            |
| Fp_HYT1D | GCTAAAGGCTATATATGGGGAAGATTGGTGGATATCGAGATTCAGGTACCGG | 1             |              |                            |
|          | GCTAAAGGCTATATATGGGGAAGATTGGNDTATATCGAGATTCAGGTACCGG | 12            |              |                            |
|          | GCTAAAGGCTATATATGGGGAAGATTGGVMAATATCGAGATTCAGGTACCGG | 6             |              |                            |
|          | GCTAAAGGCTATATATGGGGAAGATTGGATGATATCGAGATTCAGGTACCGG | 1             |              |                            |
| Rp_PF1   | CTGTATGGCGCTAGGAC                                    |               |              | Fragment A, reverse primer |
| Fp_PFN1A | ACATACCGCGATCCTGCANDTNDTATTTTCCTAAAGGCAAAGGCC        | 144           | P188X, F189X | Fragment B, forward primer |
|          | ACATACCGCGATCCTGCANDTVMATTTTCCTAAAGGCAAAGGCC         | 72            |              |                            |
|          | ACATACCGCGATCCTGCANDTATGTATTTTCCTAAAGGCAAAGGCC       | 12            |              |                            |
|          | ACATACCGCGATCCTGCANDTTGGTATTTTCCTAAAGGCAAAGGCC       | 12            |              |                            |
| Fp_PFV1B | ACATACCGCGATCCTGCAMAVMAATTTTCCTAAAGGCAAAGGCC         | 36            |              |                            |

|           |                                                          |     |                        |                                                             |
|-----------|----------------------------------------------------------|-----|------------------------|-------------------------------------------------------------|
|           | ACATACCGCGATCCTGCAV <b>MANDT</b> TATTTTCCTAAAGGCAAAGGCC  | 72  |                        |                                                             |
|           | ACATACCGCGATCCTGCAV <b>MAATGT</b> TATTTTCCTAAAGGCAAAGGCC | 6   |                        |                                                             |
|           | ACATACCGCGATCCTGCAV <b>MATGGT</b> TATTTTCCTAAAGGCAAAGGCC | 6   |                        |                                                             |
| Fp_PFA1C  | ACATACCGCGATCCTGCA <b>ATGATG</b> TATTTTCCTAAAGGCAAAGGCC  | 1   |                        |                                                             |
|           | ACATACCGCGATCCTGCA <b>ATGTGGT</b> TATTTTCCTAAAGGCAAAGGCC | 12  |                        |                                                             |
|           | ACATACCGCGATCCTGCA <b>ATGVMA</b> TATTTTCCTAAAGGCAAAGGCC  | 6   |                        |                                                             |
|           | ACATACCGCGATCCTGCA <b>ATGTGGT</b> TATTTTCCTAAAGGCAAAGGCC | 1   |                        |                                                             |
| Fp_PFT1D  | ACATACCGCGATCCTGCA <b>TGGTGGT</b> TATTTTCCTAAAGGCAAAGGCC | 1   |                        |                                                             |
|           | ACATACCGCGATCCTGCA <b>TGGNDT</b> TATTTTCCTAAAGGCAAAGGCC  | 12  |                        |                                                             |
|           | ACATACCGCGATCCTGCA <b>TGGVMA</b> TATTTTCCTAAAGGCAAAGGCC  | 6   |                        |                                                             |
|           | ACATACCGCGATCCTGCA <b>TGGATG</b> TATTTTCCTAAAGGCAAAGGCC  | 1   |                        |                                                             |
| Rp_TYR1   | GTAACTGCACCAAGTAAACC                                     |     |                        | Fragment B, reverse primer                                  |
| Fp_TYRN1A | GTTTCACTGGTGCAGTAACTAT <b>NDT</b> CGTGCTTTACCCATAAACTGG  | 6   | Y235X                  | Fragment C, forward primer                                  |
| Fp_TYRV1B | GTTTCACTGGTGCAGTAACTAT <b>VMAC</b> GTGCTTTACCCATAAACTGG  | 3   |                        |                                                             |
| Fp_TYRA1C | GTTTCACTGGTGCAGTAACTAT <b>ATG</b> CGTGCTTTACCCATAAACTGG  | 0.5 |                        |                                                             |
| Fp_TYRT1D | GTTTCACTGGTGCAGTAACTAT <b>TGG</b> CGTGCTTTACCCATAAACTGG  | 0.5 |                        |                                                             |
| Rp_PUC    | AGCGGATAACAATTTACACAGG                                   |     |                        | Fragment C, reverse primer                                  |
| Fp_PUC_EH | CTGAAATGAGCTGTTGACAATTAATCATCGGCTCGTATAATG               |     |                        | Fragment 1A, forward primer                                 |
| Rp-BamHI  | CAGGATCCCGGTATGTCAATATTTTCTTAAGAACAGACTTAGCACC           |     |                        | Fragment 1A, reverse primer                                 |
| Fp_BamHI  | GGTGCTAAGTCTGTTCTTAAGAAAATATTGACATACCGGGATCCTG           |     | R184 silent mutation,  | Fragment BC, forward primer, introducing <i>Bam</i> HI site |
| Rp_PUC_EH | GACCATGATTACGCCAAGCTTGCAATGC                             |     |                        | Fragment BC, reverse primer                                 |
| Fp_PCEH   | CGGATAACAATTTACACAGG                                     |     |                        | Forward primer, StEH                                        |
| Rp_BCEH   | GGAAACAGCTATGACCATG                                      |     |                        | Reverse primer, StEH                                        |
| NcoI_fp   | AATCCTCTTCATCCACGGCTCCCTGAACT                            |     | H31H, silent mutation  | Forward primer, removing one <i>Nco</i> I site              |
| Paul_fp   | CGACTGGGGCGCGCTAATTGCTTGCCATT                            |     | L109L, silent mutation | Forward primer, introducing <i>Paul</i> site                |
| fp_D105A  | GTGTTTGTCTGTTGCGCACGCCTGGGGCGCGTTAATTGCTTGG              |     |                        | Forward primer for D105A mutagenesis                        |
| rp_D105A  | CCAAGCAATTAACGCGCCCCAGGCGTGCGCAACGACAAACAC               |     |                        | Reverse primer for D105A mutagenesis                        |

**Table S2** Deduced amino acid sequences of selected protein variants

| Clone #                           | Amino acid position |         |         |         |         | Comments           |
|-----------------------------------|---------------------|---------|---------|---------|---------|--------------------|
|                                   | H153                | Y154    | P188    | F189    | Y235    |                    |
| HYPFV-2_1, -2_2, -3_1, -3_2, -3_3 | ○ <sup>a</sup>      | ○       | ○       | ○       | V (gtt) |                    |
| HYPFI-2, -3_1, -3_2, -3_3         | ○                   | ○       | ○       | ○       | I (att) |                    |
| HYPFR-1_1                         | ○                   | ○       | ○       | ○       | R (cgt) |                    |
| HYPFR-1_2                         | ○                   | ○       | ○       | ○       | R (cgt) | E198D<br>(gag→gac) |
| HYPSE-2, -3                       | ○                   | ○       | ○       | S (agt) | E (gaa) |                    |
| HYPFC-1, -3                       | ○                   | ○       | ○       | ○       | C (tgt) |                    |
| HYPFD-1                           | ○                   | ○       | ○       | ○       | D (gat) |                    |
| HYPFG-1                           | ○                   | ○       | ○       | ○       | G (ggt) |                    |
| HYPFH-2                           | ○                   | ○       | ○       | ○       | H (cat) |                    |
| VEPFR-1                           | V (gtt)             | E (gaa) | ○       | ○       | R (cgt) | S311N<br>(agc→aac) |
| GYFPV-1                           | G (ggt)             | ○       | F (ttt) | P (cca) | V (gtt) |                    |
| HYFAV-3                           | ○                   | ○       | F (ttt) | A (gca) | V (gtt) |                    |
| YNPFH-2                           | Y (tat)             | N (aat) | ○       | ○       | H (cat) |                    |
| HYACK-1                           | ○                   | ○       | A (gca) | C (tgt) | K (aaa) |                    |
| HYFKY-2                           | ○                   | ○       | F (ttt) | K (aaa) | ○       |                    |
| HWPFT-2                           | ○                   | W (tgg) | ○       | ○       | T (aca) |                    |
| ISTMK-3                           | I (att)             | S (agt) | T (aca) | M (atg) | K (aaa) |                    |
| QMLGY-3                           | Q (caa)             | M (atg) | L (ctt) | G (ggt) | ○       |                    |
| HYMMY-3                           | ○                   | ○       | M (atg) | M (atg) |         |                    |
| CEYFC-3                           | C (tgt)             | E (gaa) | Y (tat) | ○       | C (tgt) |                    |
| VKPFY-3                           | V (gtt)             | K (aaa) | ○       | ○       | ○       |                    |
| HYFHY-3                           | ○                   | ○       | F (ttt) | H (cat) | ○       |                    |
| HYAKM-3                           | ○                   | ○       | A (gca) | K (aaa) | M (atg) |                    |
| HYEWW-3                           | ○                   | ○       | E (gaa) | W (tgg) | W(tgg)  |                    |
| WAPFH-3                           | W (tgg)             | A (gca) | ○       | ○       | H (cat) |                    |
| HYYAW-3                           | ○                   | ○       | Y (tat) | A (gca) | W (tgg) |                    |
| HYQQL-3                           | ○                   | ○       | Q (caa) | Q (caa) | L (ctt) |                    |
| EAPFY-3                           | E (gaa)             | A (gca) | ○       | ○       | ○       |                    |
| EQPQL-3                           | E (gaa)             | Q (caa) | ○       | Q (caa) | V (gtt) |                    |
| KKMAW-3                           | K (aaa)             | K (aaa) | M (atg) | A (gca) | W (tgg) |                    |

<sup>a</sup> ○, no substitution. Naming is according to amino acid substitution in the linear sequence. The number following the one-letter sequence refers to the round of phage display selection from which the clone was isolated.

## Supporting Figures

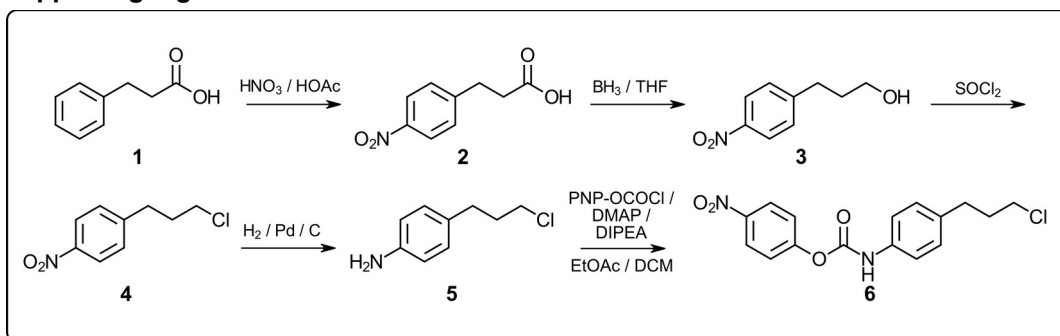

**Fig. S1** Synthesis of building block 6 (see **Figs. S4–S7** for NMR spectra).

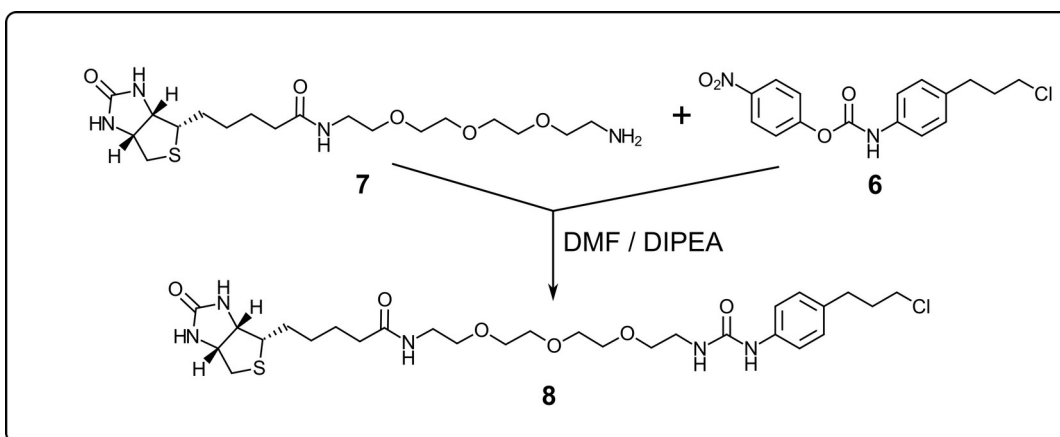

**Fig. S2** Block synthesis of bait substrate (8) used in phage display selection (see **Fig. S8** for NMR spectra).

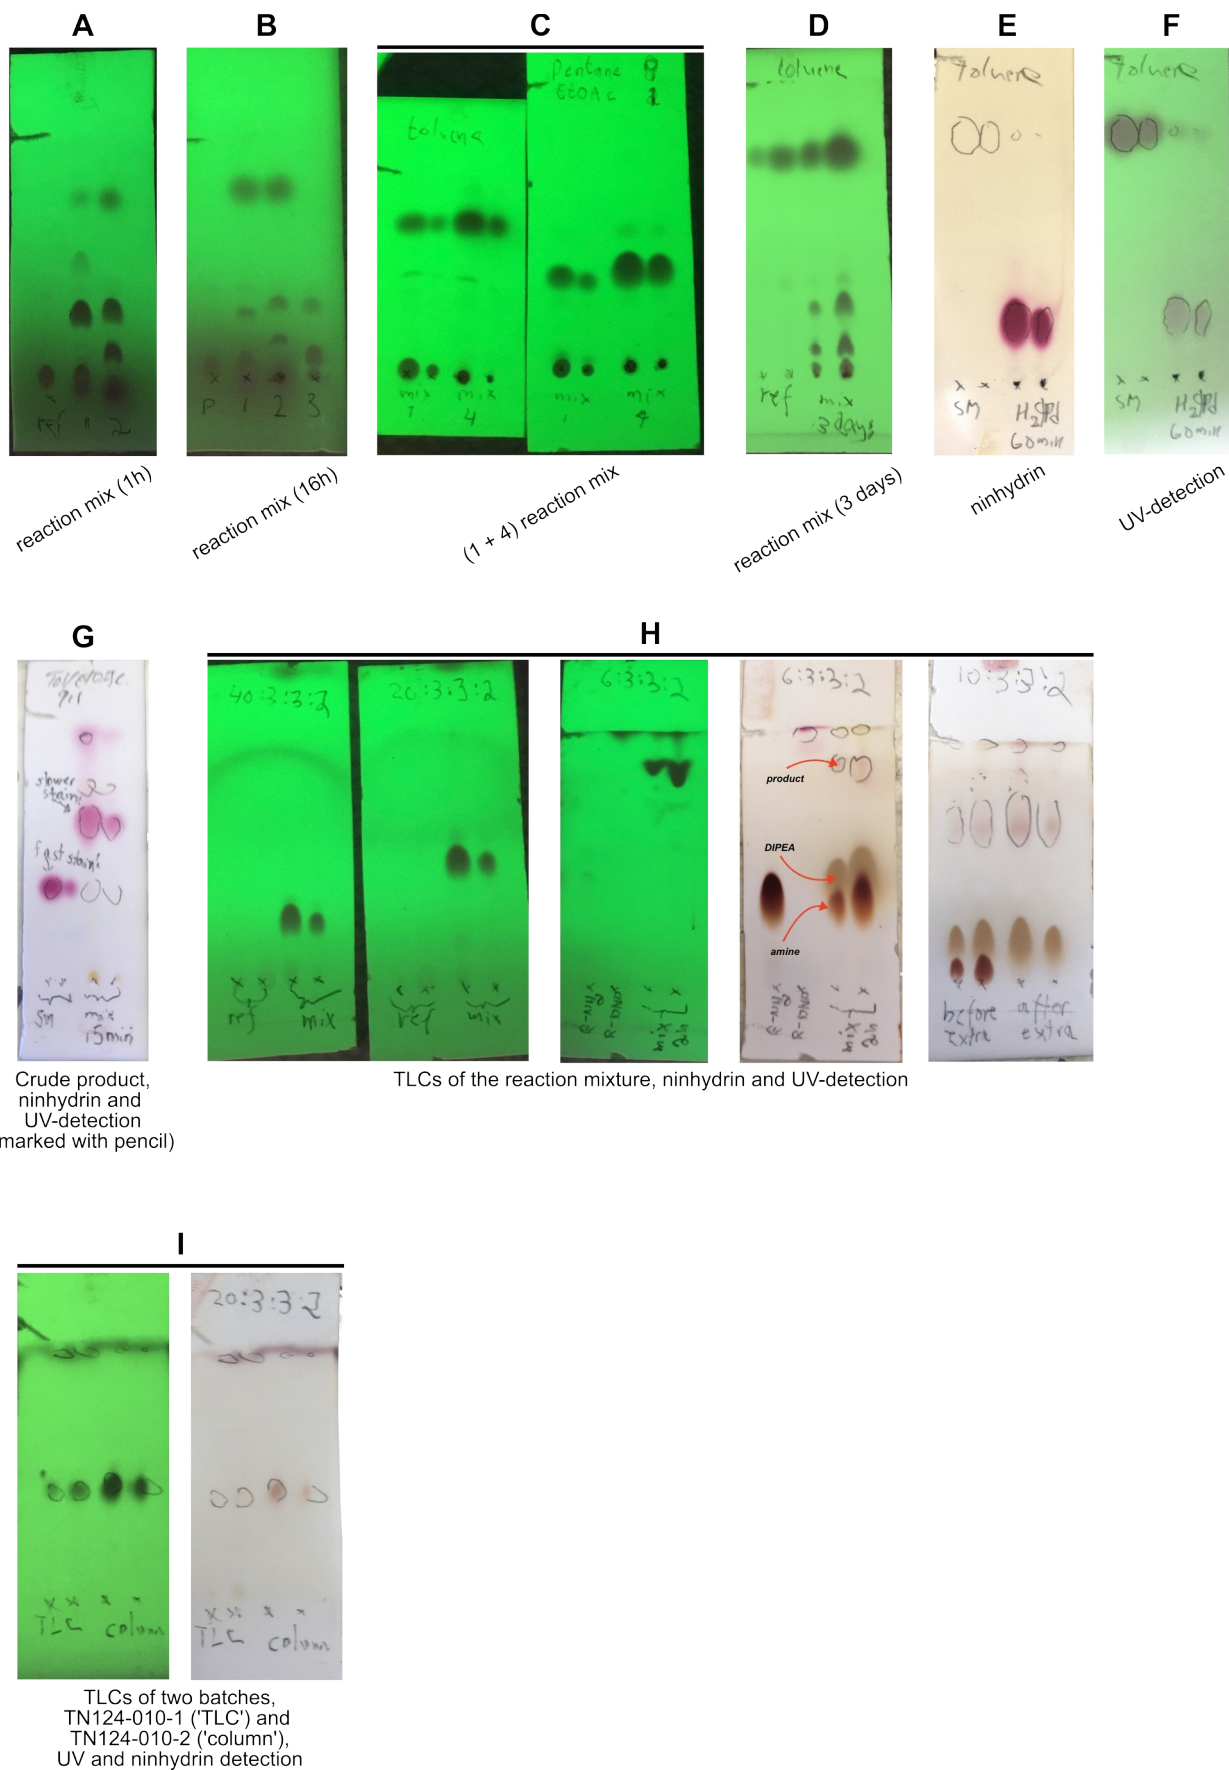

**Fig. S3** TLC chromatograms of synthesis intermediates leading to compound **8**.

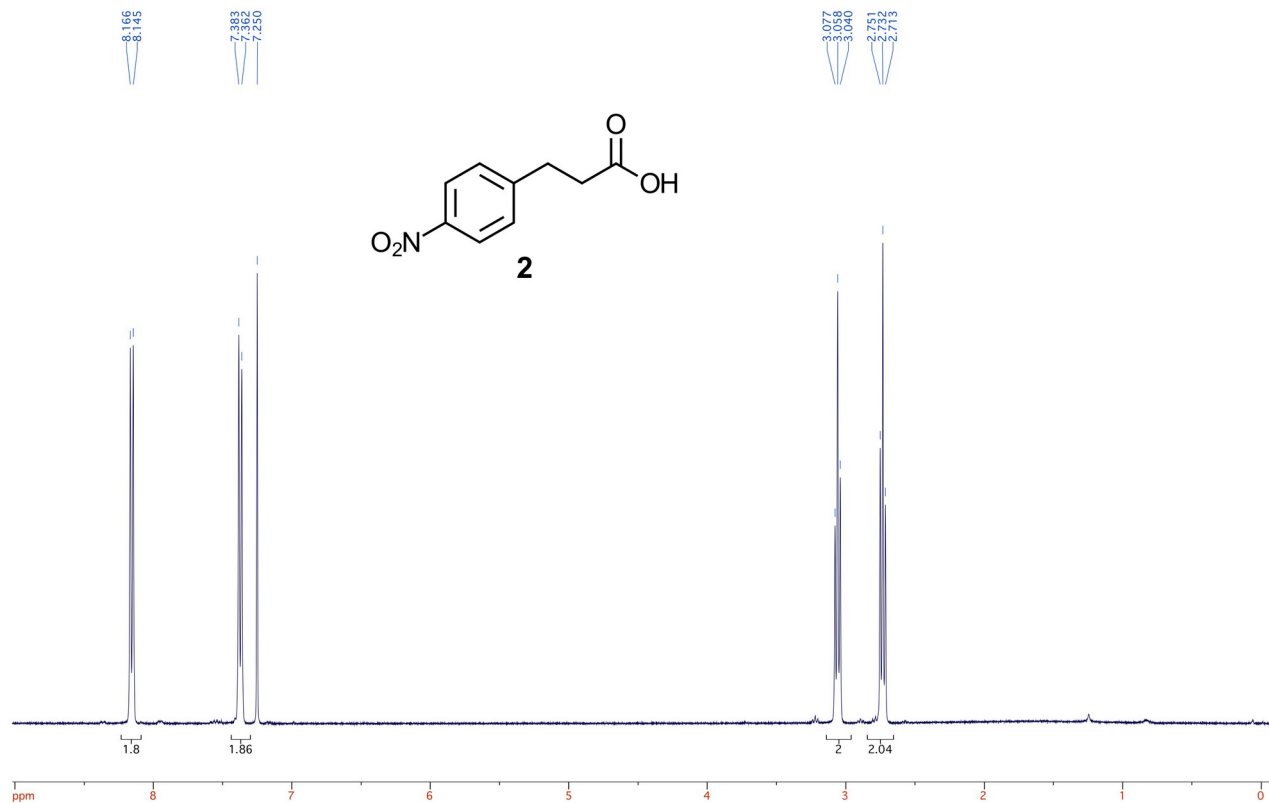

**Fig. S4** <sup>1</sup>H-NMR spectrum of compound **2**.

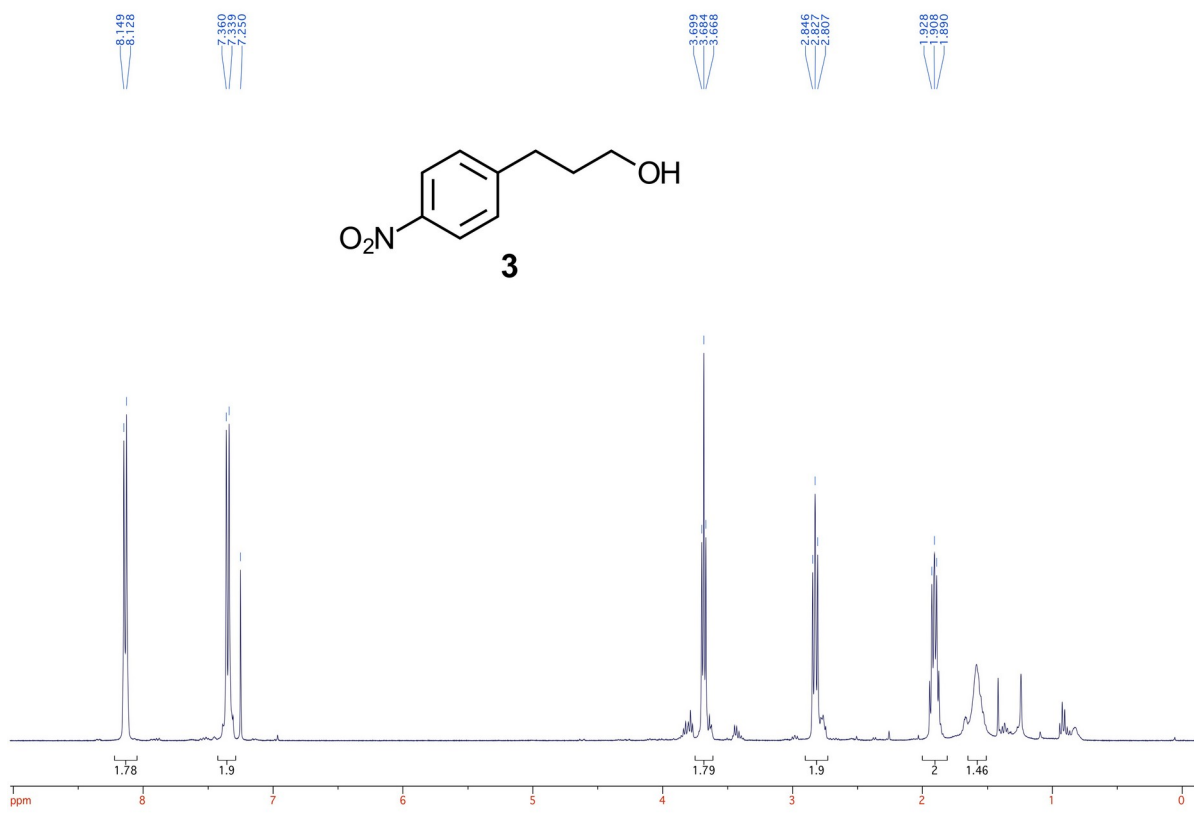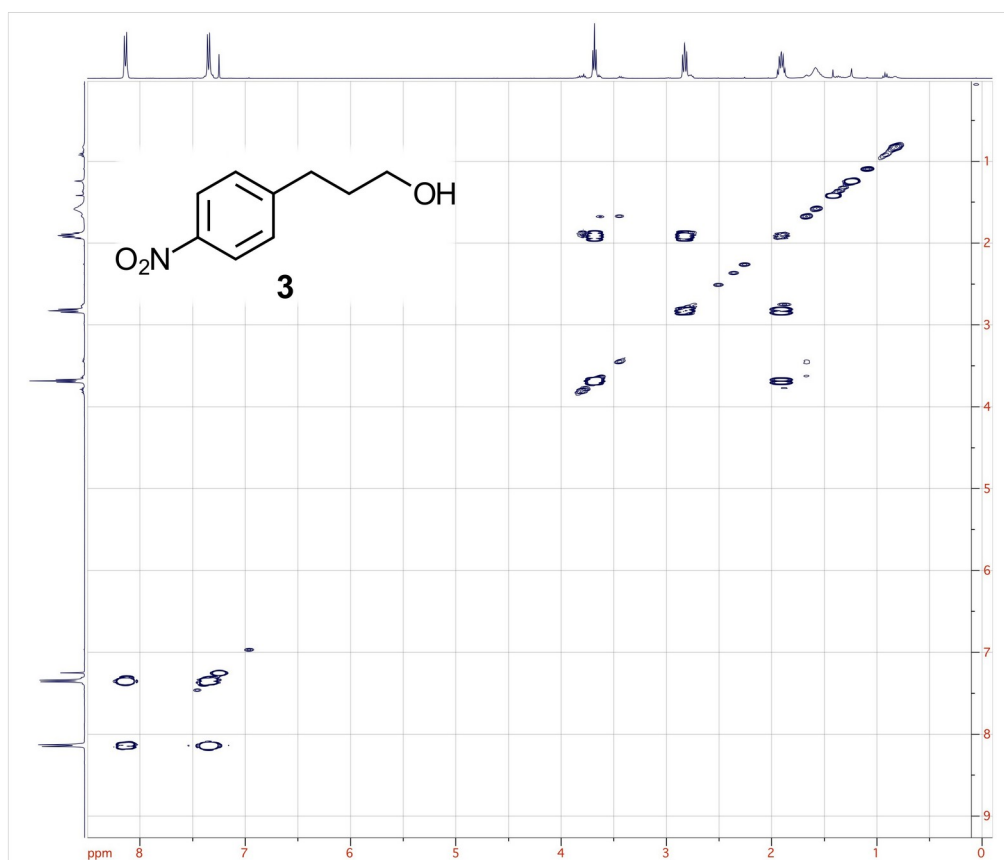

Fig. S5 <sup>1</sup>H-NMR (top) and COESY (bottom) spectra of compound 3.



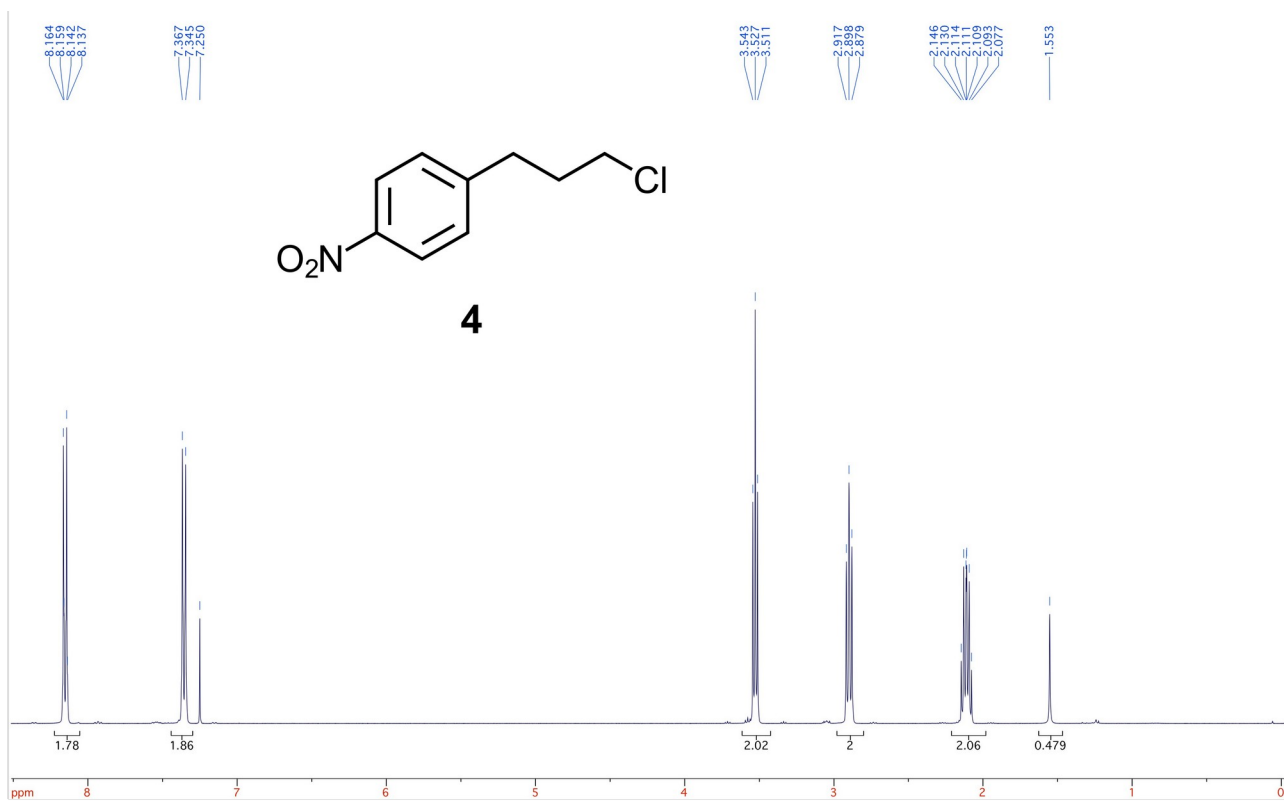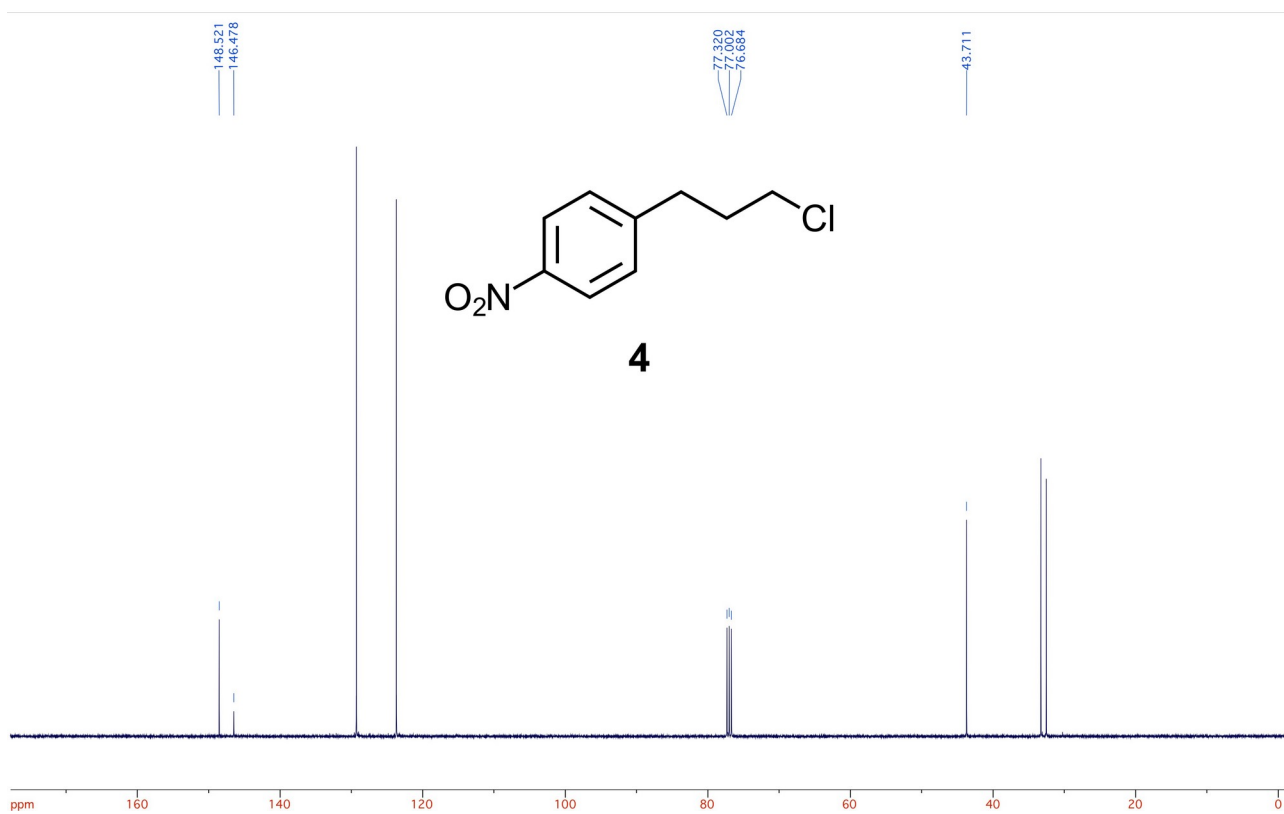

**Fig. S6**  $^1\text{H}$ - (top) and  $^{13}\text{C}$ -NMR (bottom) spectra of compound **4**.

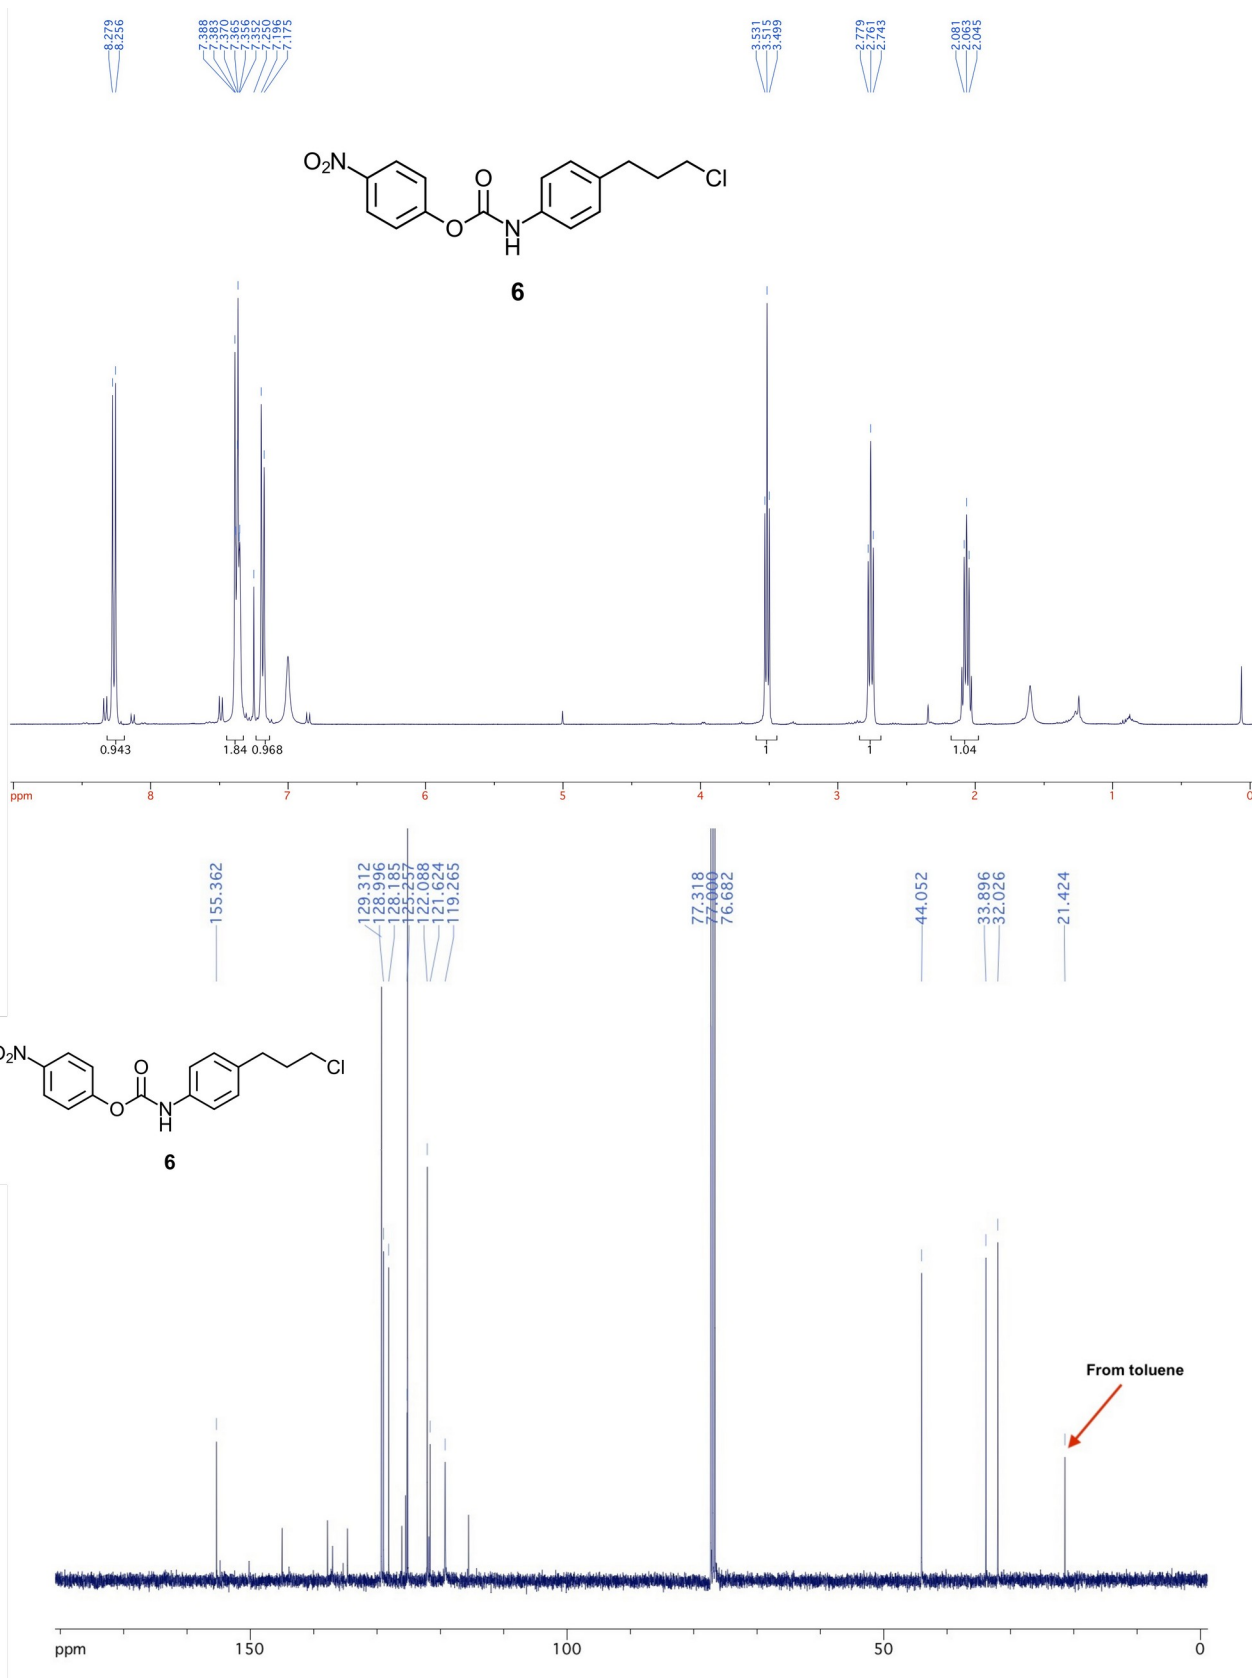

**Fig. S7** <sup>1</sup>H- (top) and <sup>13</sup>C-NMR (bottom) spectra of compound 6.

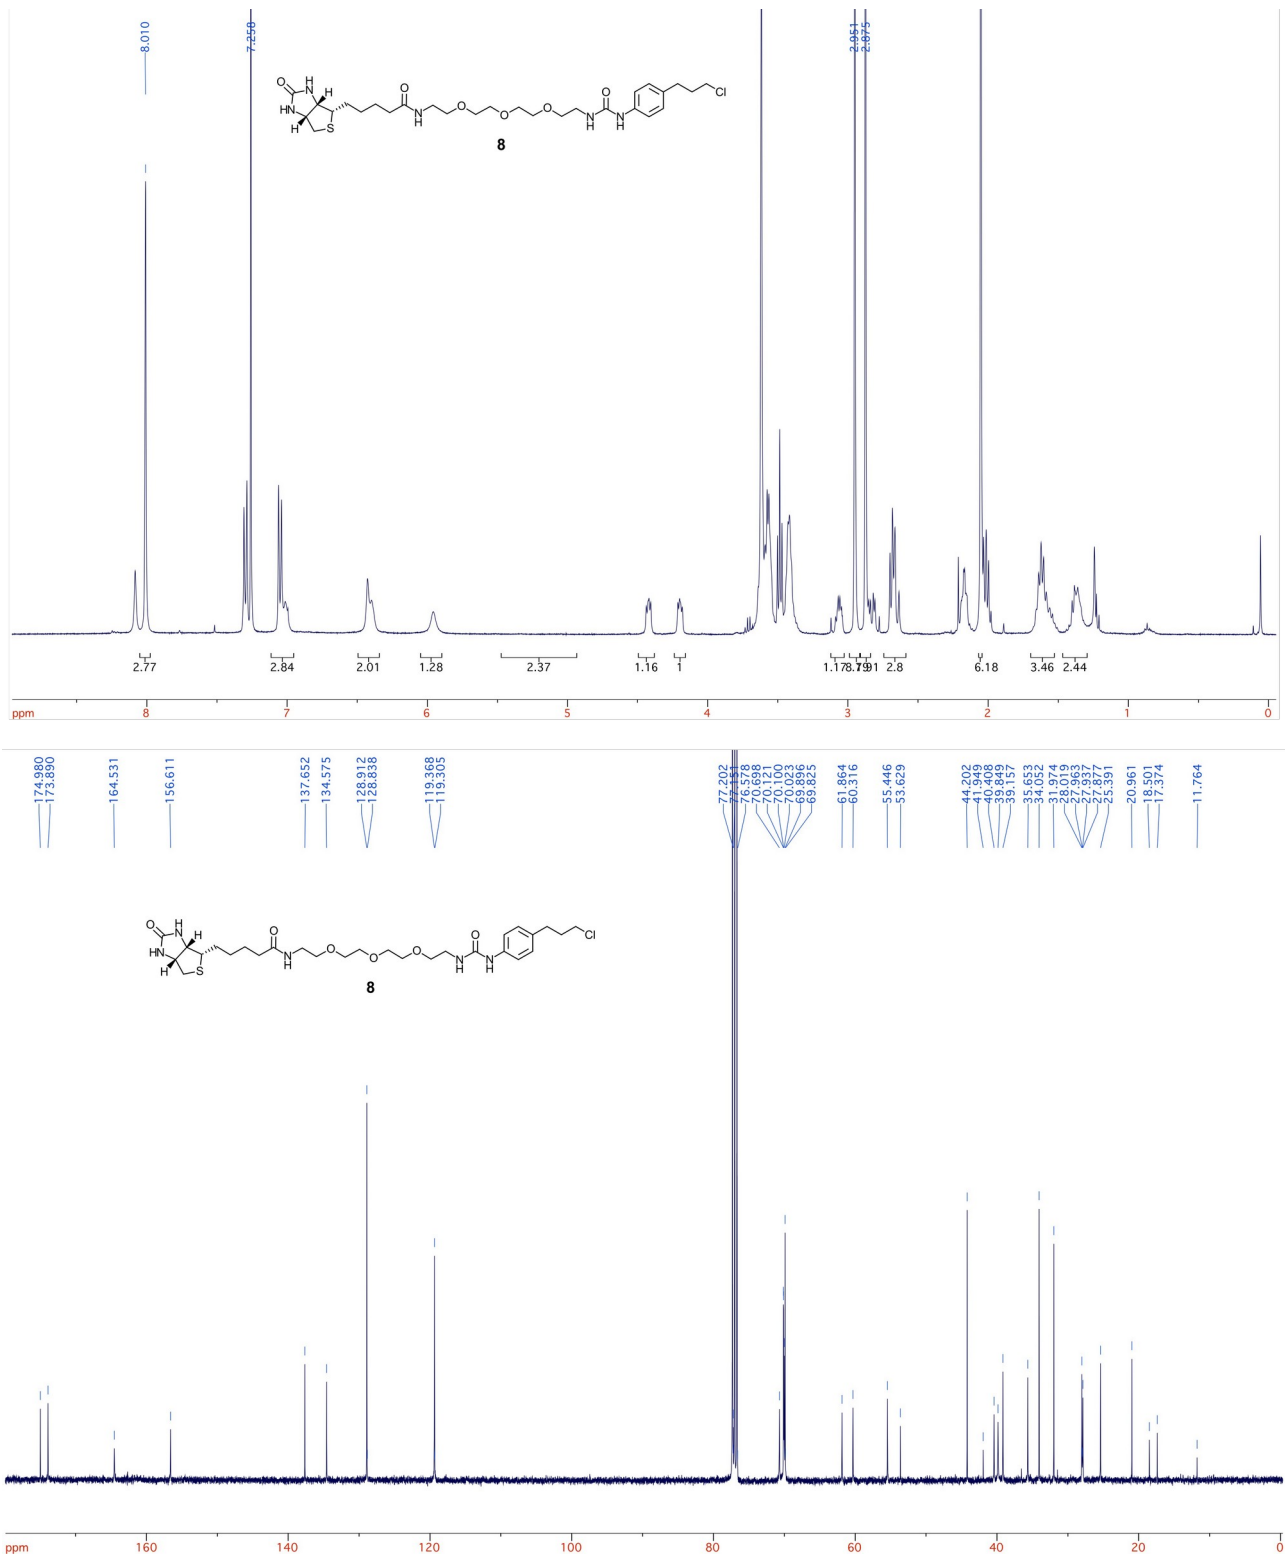

**Fig. S8**  $^1\text{H}$ - (top) and  $^{13}\text{C}$ -NMR (bottom) spectra of compound **8**.

```

    30      32      107      109
... ATC CAC GGC ... // ... GGC GCG CTA ...
   I  H  G      G  A  L
   NcoI      PauI
  
```

**Fig. S9** Silent mutations (in yellow) in the StEH1 cDNA that removes an *NcoI* site at codons 30 – 32 and introduces a unique *Paul* site at codons 107 – 109.

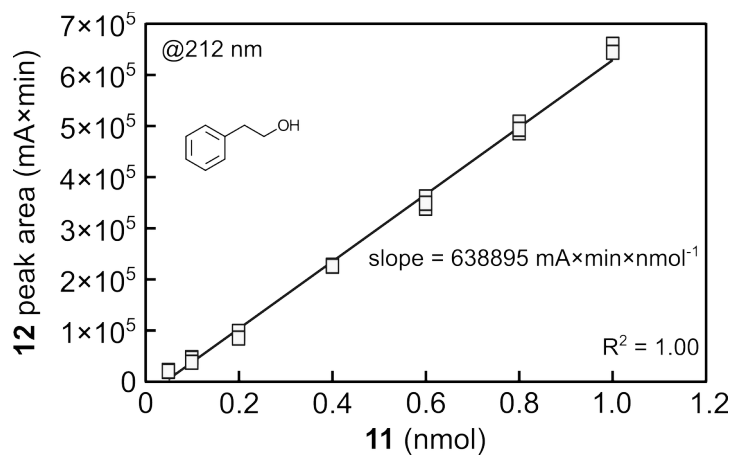

**Fig. S10** Standard curve of peak area as a function of amount of alcohol **11**.
